# Supplementary material for: Annual carbon dioxide flux over seasonal sea ice in the Canadian Arctic
Source: Copernicus journal article supplement (doi:10.5194/egusphere-2025-1802), 2025-05-05
Supplement: Supplementary file [file egusphere-2025-1802-AC1-supplement.pdf]

## **Response to Reviewer 1**

Reviewer comments in black.

Author responses in blue.

New manuscript text in red.

---

### **Reviewer 1 Comments**

This paper shows the continuous measurements of CO<sub>2</sub> flux collected from a 10-m eddy covariance tower in a coastal-marine environment in the Canadian Arctic Archipelago over the course of a 17-month period. The extended length of data collection resulted in a unique dataset that includes measurements from two spring melt and summer seasons and one 20 autumn freeze-up. Generally, this paper is written well and conclusion is clear. However, for explanation of the pCO<sub>2</sub> sw calculated based on the FCO<sub>2</sub>, K, and pCO<sub>2</sub> air are unrealistic values (e.g. zero). Therefore, author should explain and adjust for the appropriate explanation.

We would like to thank Reviewer 1 for their insightful comments. We have addressed the reasoning behind the large swings in pCO<sub>2</sub>w below, in response to specific comments. We also found their suggestion to include salinity effects to be an important addition to the manuscript. We reworked the summer analysis to better highlight the dominance of the thermodynamic processes on F<sub>CO<sub>2</sub></sub> during that season.

Comments are indicated in the following.

Line 21: "air-sea" should "air–sea" (wider minus) throughout the text.

While the case for choosing the en dash to connect “air” and “sea” makes perfect sense (i.e., read as “air to sea exchange”), we prefer the hyphen to connect “air” and “sea”. Grammatically, it has a subtle difference from the en dash version, namely to create a compound adjective to describe “exchange”, “fluxes”, etc., which is still within the bounds of acceptable usage. Moreover, this has been the convention used by many respected scientists for decades.

Line 21: Author indicated that sea ice is barrier. However, in lines 28–30, outgassing occurs during freezing sea ice. Author wanted to indicate zero after freezing. Therefore, to avoid misunderstanding, author should write correctly.

To disambiguate the flux barrier of thick winter ice from the outgassing that occurs at the beginning of the freezing process we made the following changes:

- Changed “full sea ice cover” to “**thick ice**”
- Changed “winter field campaign” to “**autumn period of the field campaign**”

Line 29: For positive flux values, it is nice if author will add "+" throughout the text.

We prefer not to add “+” for positive values. It is accepted as standard that values not preceded by a minus sign are positive. We think the “+” looks clunky, especially followed by “ $\pm$ ” standard deviation. That said, we understand that directionality was particularly important to this work. For most flux values presented we had identified the direction in text form (e.g., “uptake”, “outgassing”, “sink”, “source”) within the paragraph. We checked the manuscript and added these qualifiers (where they were absent) to help make directionality more clear.

Lines 32–33: “CO<sub>2</sub> outgassing from the freezing period to be 5 to 15% of the magnitude of the estimated Arctic CO<sub>2</sub> sink”. If same direction of flux, we can say the percentage with respect to total. However, it is different direction (positive and negative). Can we say 5 to 15%?

Yes, we don’t see why not. It states that it is the opposite direction. The purpose here was only to identify the relative magnitude of this generally unaccounted-for process. To highlight that it certainly warrants some attention. We’ve modified the sentence to include “a counterbalance equivalent to” in front of “5 to 15%” to highlight the opposing direction more clearly.

Line 55: CaCO<sub>3</sub> salts. We do not need “salts”.

We removed “salts”

Line 156: Author should add the detection limit, standard deviation, and accuracy of FCO<sub>2</sub>.

Yes, that is relevant information. We have added the following text:

As the product of measurements from different instruments, the accuracy of the FCO<sub>2</sub> measurement is challenging to quantify without an independent validation, which was not performed. The LI-7200 has a measurement accuracy of  $\pm 1\%$  with an RMS noise of 0.11 ppm at 10 Hz, while the vertical wind speed of the CSAT3 is accurate within  $\pm 0.04 \text{ m s}^{-1}$  with an RMS noise of  $0.0005 \text{ m s}^{-1}$ . While the noise can occasionally be larger than the true environmental fluctuations, it has been found to minimally influence the calculated FCO<sub>2</sub> because the noise from the separate instruments is uncorrelated and therefore filtered out by the flux calculation (Miller et al., 2010).

An investigation of FCO<sub>2</sub> measurement uncertainties from ships indicated a detection limit for a dried, closed-path eddy covariance system of roughly  $|\Delta p\text{CO}_2| > 35 \text{ } \mu\text{atm}$  for the mean wind speed observed in this study (Blomquist et al., 2014). The  $\Delta p\text{CO}_2$  in the region often exceeds this value (Duke et al., 2021; Sims et al., 2023). Additionally, we expect some reduction in the detection limit (i.e., increased sensitivity) for this study compared to ship-based studies, because the measurements were from a stationary tower. Therefore, the observations avoid some common sources of uncertainty experienced from moving platforms, such as the needed for a complex wind vector motion correction and tilt effects that degrade the performance of the LI-7200 (Miller et al., 2010; Vandemark et al., 2023).

While we cannot perform a direct assessment of  $F_{CO_2}$  uncertainty, we can estimate the order of magnitude of the uncertainty by assessing the variation in  $F_{CO_2}$  measurements during periods expected to have stable fluxes. Here we do that by calculating the standard deviation for 6-hour intervals during periods of full ice cover, when diurnal variations in  $F_{CO_2}$  were expected to be minimal. The standard deviation across these winter periods had a mean of  $\pm 1.02 \text{ mmol m}^{-2} \text{ d}^{-1}$  and a median of  $\pm 0.75 \text{ mmol m}^{-2} \text{ d}^{-1}$ . Spring and summer seasons were excluded from the estimate because standard deviation measured during those periods was expected to be a combination of measurement uncertainty and actual diurnal  $F_{CO_2}$  trends.

Added the following text to the Fig. 4 caption:

Uncertainty in the  $F_{CO_2}$  measurement was quantified by calculating the standard deviation from each 6-hour average (comprised of eighteen 20-minute flux intervals) during periods of full ice cover, when diurnal  $F_{CO_2}$  variations were minimal. The standard deviations across these winter periods had a mean of  $\pm 1.02 \text{ mmol m}^{-2} \text{ d}^{-1}$  and a median of  $\pm 0.75 \text{ mmol m}^{-2} \text{ d}^{-1}$ .

Added the following reference to the bibliography:

Vandemark, D., Emond, M., Miller, S. D., Shellito, S., Bogoev, I., and Covert, J. M.: A  $CO_2$  and  $H_2O$  Gas Analyzer with Reduced Error due to Platform Motion. *J Atmos Ocean Technol*, 40, 845–854. doi: 10.1175/JTECH-D-22-0131.1, 2023

Line 176:  $CO_2$  in the brine?

Added: (including brine)

Line 197: Section of "Results and Discussion" will be divided into "Results" section and "Discussion" section.

We deliberately organized the manuscript in an unusual way. The reason for a “Results and Discussion” section was to enable the results from each season to be followed by a discussion of that season (i.e., “Spring Result” followed by “Spring Discussion”, etc). In an early version of the manuscript, we had the more traditional format, but found that the varied processes occurring in each season made holding all the results in memory too difficult. We found that the individual seasons basically acted as their own small studies and therefore were more easily discussed immediately following their corresponding results.

Line 199: Freezing point of seawater?

Added: of seawater

Line 341: Sea ice melt water affects low  $p\text{CO}_2$  sw due to dilution effect in lead water etc. Author will indicate the potential effect of  $p\text{CO}_2$  dilution effect by the melt water supply based on salinity data.

We added the following text:

The salinity mooring data was inspected to determine whether melt water dilution was observed. At 13 m depth there was a small decrease in  $S_{\text{sw}}$  ( $-0.2$ ) over the late spring period. This would correspond to a small decrease in  $p\text{CO}_{2\text{w}}$  ( $-3 \mu\text{atm}$ ), a relatively small  $F_{\text{CO}_2}$  forcing. However, because the water was stratified at this period (i.e.,  $\text{SST} > T_{13\text{m}}$ ), it is possible (and likely) that the change in  $S_{\text{sw}}$  at the surface was greater, resulting in a larger  $F_{\text{CO}_2}$  forcing.

Line 370: It would be nice if author will compare with SST and  $p\text{CO}_2$  because  $p\text{CO}_2$  will change depend on temperature. Author can indicate that this  $p\text{CO}_2$  change can explain based on thermodynamic process or not.

We replaced Figure 9 with a new plot showing the  $p\text{CO}_{2\text{w}}$  projected forward from the first day of summer using the temperature and salinity relationships of Takahashi et al. (1993) and Sarmiento and Gruber (2006). These are compared to  $p\text{CO}_{2\text{w}}$  estimated using Eq. 1 with the measured  $F_{\text{CO}_2}$ . In both early and mid summer there is good agreement/tracking between both estimates. This suggests that thermodynamic processes are the most relevant during these summer seasons. We also added a salinity curve to Figure 13 to highlight its directional impact on the  $F_{\text{CO}_2}$  across seasons. We added the following text to the manuscript:

Added to Summer Results:

We separated the summer season into three subseasons (early, mid, and late) corresponding to changes in environmental conditions. The early season (13 July 2017 – 13 Aug 2017) was from the beginning of open water until peak SST and showed increasing  $F_{\text{CO}_2}$  (Fig. 8). The mid season (13 Aug 2017 – 1 Oct 2017) was from peak SST until the water profile became unstable and showed decreasing  $F_{\text{CO}_2}$  (Fig. 8). The late season (1 Oct 2017 – 14 Oct 2017) was the period immediately preceding the onset of freezing in which the mixed layer deepened. We then investigated the role of thermodynamic processes on the observed seasonal  $F_{\text{CO}_2}$  changes. Figure 9 shows a  $p\text{CO}_{2\text{w}}$  estimate derived from  $F_{\text{CO}_2}$  using Eq. (1) and a  $p\text{CO}_{2\text{w}}$  projection calculated using established temperature and salinity relationships ( $\frac{1}{p\text{CO}_{2\text{w}}} \frac{\partial p\text{CO}_{2\text{w}}}{\partial \text{SST}} \approx 0.0423^\circ\text{C}^{-1}$  from Takahashi et al. [1993];  $\frac{S_{\text{sw}}}{p\text{CO}_{2\text{w}}} \frac{\partial p\text{CO}_{2\text{w}}}{\partial S_{\text{sw}}} \approx 1$  from Sarmiento and Gruber [2006]). For the thermodynamic projection, the  $F_{\text{CO}_2}$ -derived  $p\text{CO}_{2\text{w}}$  estimate for the first day of early summer was used as a starting  $p\text{CO}_{2\text{w}}$ , then projected forward for each flux interval through the end of summer using only the above SST and  $S_{\text{sw}}$  relationships. In both early and mid summer, the two  $p\text{CO}_{2\text{w}}$  estimates track well, indicating that changes in SST and  $S_{\text{sw}}$  are important drivers of  $F_{\text{CO}_2}$  changes during these seasons. In late summer, the curves show greater divergence with the  $F_{\text{CO}_2}$ -derived  $p\text{CO}_{2\text{w}}$  estimate showing larger values (over  $25 \mu\text{atm}$  greater) than the thermodynamic projection. While the  $F_{\text{CO}_2}$  increased from its seasonal low during this late summer period (Fig. 4 & 8; due to the reduced wind speed [Fig. 3e]), the  $F_{\text{CO}_2}$ -derived  $p\text{CO}_{2\text{w}}$  estimate continued to

drop in magnitude (Figs. 7 & 9). This was in opposition to the SST forcing, but coincided with deepening of the mixed layer and increased  $S_{SW}$  values.

#### Added to Summer Discussion:

In summer, thermodynamic drivers appear to be the most important contributors to the direction and magnitude of  $F_{CO_2}$ . For most of the summer, the trend in  $F_{CO_2}$  corresponds to the trend in SST. Both increase in early summer, both decrease in mid summer (Figs. 4 & 8). The mechanism causing this pattern is the direct positive relationship between SST and  $pCO_{2w}$  (Takahashi et al., 1993). As SST increases, it causes  $pCO_{2w}$  to increase, which results in increased outgassing of  $CO_2$  to the atmosphere.  $S_{SW}$  also has a direct positive relationship with  $pCO_{2w}$  (Sarmiento and Gruber, 2006). In this instance, steady reductions in  $S_{SW}$  over the course of the early and mid summer periods (28 down to 25) partially offsets the projected peak magnitude of  $pCO_{2w}$  by the SST effect alone. The projection of  $pCO_{2w}$  using both SST and  $S_{SW}$  effects tracks well with the  $F_{CO_2}$ -derived  $pCO_{2w}$  estimate (Fig. 9). This suggests that SST and  $S_{SW}$  are the main drivers of changes to  $F_{CO_2}$  in the early and mid summer periods. The one period of the summer in which the thermodynamic  $pCO_{2w}$  projection most noticeably diverges from the  $F_{CO_2}$ -derived  $pCO_{2w}$  estimate is late summer (1 Oct 2017 – 14 Oct 2017). During this period the SST continues to drop, but  $S_{SW}$  begins to increase (25 up to 27). This corresponds to a reduced (but still negative) slope to both the  $F_{CO_2}$ -derived  $pCO_{2w}$  estimate and the thermodynamic projection. The cause of the increased  $S_{SW}$  was the reversal of the temperature profile from stable to unstable (i.e.,  $SST < T_{13m} < T_{22m} < T_{39m}$ ) resulting in greater upward mixing of higher salinity water from depth. While the similar trends in both the  $pCO_{2w}$  estimate and the thermodynamic projection suggest that SST and  $S_{SW}$  are still important drivers of  $F_{CO_2}$  during late summer, the higher magnitudes of the  $pCO_{2w}$  estimate compared to the thermodynamic projection suggest an additional source of increased  $pCO_{2w}$ . One possibility is that the increased mixing of water from depth during this late summer period may have, in addition to increasing  $S_{SW}$ , brought  $CO_2$ -rich waters to the surface, thus slightly offsetting some of the  $pCO_{2w}$  reductions expected by the thermodynamic processes alone.

As stated above, the pattern of  $F_{CO_2}$  in 2018 was similar to 2017, with the exception of 2018 showing increasing positive fluxes and increasing  $pCO_{2w}$  in the first two weeks of September, running in opposition to the SST forcing. One explanation is that the lower SST during 2018 enabled mixed layer deepening a month earlier than the previous year, causing mixing to increase  $pCO_{2w}$  (e.g., due to  $S_{SW}$  and  $CO_2$  concentration effects) earlier in the season. Unfortunately, the mooring temperature and salinity data were not available during this period to confirm. However, an inspection of the flux cospectra during this period showed no reason to discount this upward trend on the grounds of flux measurement error.

#### Added to Process Summary description of summer:

Though weaker than the SST effect, salinity trends were also relevant to the thermodynamic forcing. In early and mid summer,  $S_{SW}$  decreased, causing a negative forcing on  $pCO_{2w}$ . In late summer  $S_{SW}$  began to increase, leading to a positive forcing on  $pCO_{2w}$ .

Added to Process Summary description of fall:

Salinity does still increase at this point, but across the early fall period its contribution towards increasing  $p\text{CO}_{2\text{w}}$  was modest (+10  $\mu\text{atm}$ ).

Added new Fig. 9 caption:

Summer 3-day average time series of  $p\text{CO}_{2\text{w}}$  derived from  $F_{\text{CO}_2}$  using Eq. (1) (black line) and  $p\text{CO}_{2\text{w}}$  projection calculated using temperature and salinity relationships (Takahashi et al., 1993; Sarmiento and Gruber, 2006; blue line). Shaded regions represent standard deviation.

Added to bibliography:

Sarmiento, J. L. and Gruber, N.: Ocean Biogeochemical Dynamics, Princeton University Press, <https://doi.org/10.2307/j.ctt3fgxqx>, 2006.

\*Also changed Takahashi et al. 2002 citations throughout the manuscript to Takahashi et al. 1993 citation because that was the original paper that published the T- $p\text{CO}_2$  relationship, so therefore it is the more appropriate article to cite.

Line 399, "aqueous" does not need.

Removed.

Line 400; For biological process, author should use reference (biological paper showing about this area) to show author's explanation in the text.

In response to the Line 370 comment above, we reworked this section entirely. We no longer refer to biological activity in this section.

Line 415: How about the high  $p\text{CO}_2$  water mixing with surface water? Because this area is polynya and high current. Can Duke et al. (2021) ( $p\text{CO}_2$  data) support author's conclusion?

No, the  $p\text{CO}_2$  measurements from Duke et al. (2021) do not support the idea of high  $\text{CO}_2$  concentrations at depth. For some of the year, they showed similar magnitudes as the tower estimates, at other times they show  $p\text{CO}_{2\text{w}}$  values far lower than those estimated using the tower measurements. It's not clear why this is the case. But that particular mooring was 35 km away. And the ship-based  $p\text{CO}_{2\text{w}}$  measurements of Sims et al. (2023) showed that this region has a high degree of spatial variability in  $p\text{CO}_{2\text{w}}$ . So, the values from that mooring are likely not comparable to our site.

Lines 504–505: If minus 9.9 Tg-C, we can say that 3.5 to 10 percent of this total Arctic sink. However, 9.9 is positive. Therefore, can we say 3.5 to 10 percent of this total Arctic sink?

It now reads “Our estimate for outgassing from the freeze-up period represents a counterbalance equivalent to 3.5 to 10% of this total Arctic sink”.

Line 572: Author can indicate Sims et al. (2023) in the pCO<sub>2</sub> discussion which will help author's assumption of relationships between flux and pCO<sub>2</sub>.

Moved Sims et al. (2023) discussion from Conclusions to Process Summary section, and added additional text. It now reads:

“The direction of fluxes that we measured across the annual cycle were in general agreement with  $\Delta p\text{CO}_2$  gradients measured by Sims et al. (2023) within a ~100 km radius of the flux station. Sims et al. (2023) did note substantial spatial variability, which makes it difficult to confidently extrapolate the net annual flux over a larger area. However, an estimate of  $k$  calculated using tower  $F_{\text{CO}_2}$  and ship-based  $p\text{CO}_{2w}$  measurements of Sims et al. (2023) during temporally-aligned courses past the island showed good agreement with existing open-water  $k$  parameterizations, providing evidence the capability of the tower-based  $F_{\text{CO}_2}$  for estimating  $p\text{CO}_{2w}$  (Butterworth and Else, 2018).”

Lines 581–582: Same comments as lines 504–505.

Changed: “may account for 5 – 15% of the annual Arctic CO<sub>2</sub> budget” to “may produce a counterbalancing outgassing equivalent to 5 – 15% of the annual Arctic CO<sub>2</sub> sink”

Line 567: Only physical factors?

Changed “physical” to “biogeophysical”

Table 1: Flux means CO<sub>2</sub> flux?

Yes. We changed “Flux direction” to “ $F_{\text{CO}_2}$  direction” in table and caption  
And we changed “delta in flux” to “delta in  $F_{\text{CO}_2}$ ” in table and caption  
In Table 2 we changed “Total Flux” to “Total  $F_{\text{CO}_2}$ ” in table.

Table 1: It is unknown how to decide the date for seasonal transition.

Added the following text to the end of the caption for Table 1:  
Seasonal cutoff dates were determined by transition to different defining processes, as identified by in situ observations from site visits and camera images.



Table 2: "Note that in this instance only the use of terms spring, summer, and fall are defined based on the zero crossings of the local regression curve from Figure 3 (and therefore straddle the seasonal demarcations defined in Table 1)". I cannot understand this. Could author explain detail?

We were referencing the incorrect figure. It should have been Figure 4. We have fixed the error.

The idea here is that throughout the annual cycle the flux direction oscillates between negative and positive. The point of Table 2 is to show the relative magnitude of these different periods of uptake and outgassing. We do this by integrating the area under the curve in Figure 4. It is not a precise measure of seasonal uptake and/or outgassing, but it does give a good estimate of the relative magnitude. We used the terms "spring uptake", "summer outgassing", "summer uptake", and "fall outgassing" to categorize these periods. These do not precisely line up with the seasonal demarcations used throughout the paper because those seasonal demarcations straddle the transitions from uptake to outgassing, and from outgassing to uptake. If we used the seasonal demarcations used for the other analyses, we would end up integrating positive and negative values and therefore would reduce the measured magnitude of those periods of uptake and outgassing. To improve the readability, we have modified the relevant caption sentences.

**Changed from the original:**

"Note that in this instance only the use of terms spring, summer, and fall are defined based on the zero crossings of the local regression curve from Figure 3 (and therefore straddle the seasonal demarcations defined in Table 1). The cumulative fluxes in this table were calculated by integrating the area under this curve."

**To:**

"The cumulative fluxes were calculated by integrating the area under the local regression curve from Figure 4 between the zero crossings separating periods of uptake from periods of outgassing. In this instance only, the use of terms "Spring", "Summer", and "Fall" are defined based on these zero crossings, identified in the "Dates" column of the table. Note that they are not precisely aligned with seasonal demarcations defined in Table 1 (which are used in all subsequent analyses). This was done to avoid integrating using seasonal demarcations that straddled positive and negative flux transitions."

Figure 1: It is nice if author will show the island shape and position of tower in the island.

Added an inset to the map to show the island shape and position of the tower. Added the following text to the caption:

"Circular inset shows the shape of Qikirtaarjuk Island, with the red dot indicating the location of the flux tower."

Figure 4: Author should add 10 and -10 for the vertical axis.

Done.



Figure 4: Why FCO<sub>2</sub> deviated widely during late spring to early fall as compared to winter and late fall?

The larger magnitude fluxes during late spring to early fall are mainly due to the fact this period has open water. The processes described in the paper (e.g., biological processes, SST changes, salinity changes, water mixing) are responsible for the flux direction oscillations during this period. Whereas the winter and late fall are ice covered, which leads to lower magnitude fluxes due to the ice acting as a barrier to exchange (except for some expulsion of CO<sub>2</sub> from ice during the freezing process in late fall).

Figure 5: I cannot imagine that pCO<sub>2</sub> become from 600 to zero within 9 hours. What is the mechanism driving such a big change? I expect that eq1 is not fit. How about the ice temperature change during 9 hours?

Yes, we called to the wrong equation. It should have been Equation 2. This has been fixed.

Our interpretation of pCO<sub>2</sub> swing from 600 to zero within the course of a day is that melt ponds rapidly form, have pCO<sub>2</sub> near zero when they melt (because CO<sub>2</sub> was expelled during the freezing process), and then uptake CO<sub>2</sub> after forming, and finally expel the CO<sub>2</sub> they've absorbed as they refreeze at night. As referenced in the Spring Discussion section pCO<sub>2</sub> of melt ponds have been measured and found to be near zero (Geilfus et al., 2015), and that they rapidly equilibrate after melting. Interestingly, the switch from uptake to outgassing indicates a sign direction in dpCO<sub>2</sub>, which at first is puzzling because if the melt ponds are undersaturated the equilibration after their melt should only bring them back to ambient air pCO<sub>2</sub> values (at maximum). This wouldn't support the outgassing observed. The expulsion of CO<sub>2</sub> from water as it freezes is the relevant process, but it's aided by the fact that it is only the surface ice which exchanges with the air. Supersaturation appears to occur near the surface. This is in line with Kotovich et al. (2016) who found outgassing due to super saturation occurring in the top 5 cm of newly formed ice, while the water below remained under-saturated. We have added this information to the text...

**Changed from the original:**

“Additionally, the estimated range of pCO<sub>2ice</sub> in this study matches that measured by Delille et al. (2014) in Antarctic pack ice (roughly 50 – 900 μatm). While that study represents seasonal changes in pCO<sub>2ice</sub>, it shows that pCO<sub>2ice</sub> of these magnitudes (0 – 600 μatm) are plausible.”

**To:**

“The low pCO<sub>2</sub> of melt ponds are expected to immediately begin to equilibrate toward atmospheric values (Geilfus et al. 2015). However, the diurnal change in flux direction from uptake to outgassing indicates that pCO<sub>2ice</sub> rose above atmospheric values. This suggests that the CO<sub>2</sub> gas expelled during freezing accumulated in a thin, supersaturated layer near the surface. This is in line with the laboratory experiment of Kotovich et al. (2016), who also observed outgassing during freezing due to supersaturation in the top 5 cm of ice, while the underlying

water remained undersaturated with respect to the atmosphere. The large range of  $p\text{CO}_{2\text{ice}}$  in this study has some analogies in the literature. This includes the range measured by Delille et al. (2014) in Antarctic pack ice (roughly 50 – 900  $\mu\text{atm}$ ) and the range observed by Geilfus et al. (2015) in Arctic springtime ice (36 – 380  $\mu\text{atm}$ ). While these studies represent daytime-only  $p\text{CO}_{2\text{ice}}$  measurements over longer time frames (seasonal and sub-week, respectively), they show that  $p\text{CO}_{2\text{ice}}$  of these magnitudes (0 – 600  $\mu\text{atm}$ ) are plausible.”

Unfortunately, we do not have a measure of ice temperature to report.

Figure 9: Author will check the relationship between SST and  $p\text{CO}_2$ , also SSS to understand the direct relationships between  $p\text{CO}_2$  and environmental factors.

See response to comment about Line 370 above.
